# Supplementary material for: Specialized box C/D snoRNPs act as antisense guides to target RNA base acetylation
Source: PubMed Central journal article supplement (PMC5464676; doi:10.1371/journal.pgen.1006804), 2017-05-24

A

## Mung Bean Nuclease Assay

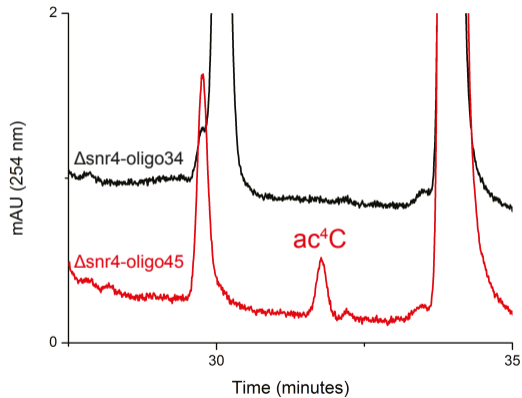

B

## RP-HPLC (tRNA)

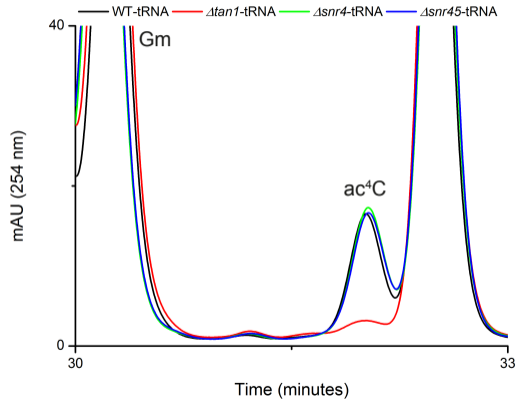

Supplement: pgen.1006804.s004.pdf [file pgen.1006804.s004.pdf]
