# Supplementary material for: Specialized box C/D snoRNPs act as antisense guides to target RNA base acetylation
Source: PubMed Central journal article supplement (PMC5464676; doi:10.1371/journal.pgen.1006804), 2017-05-24

**A****snR4**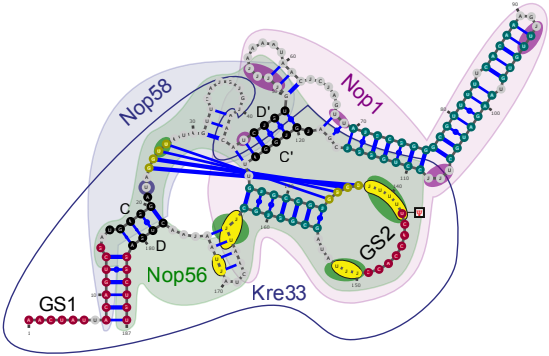**B****snR45**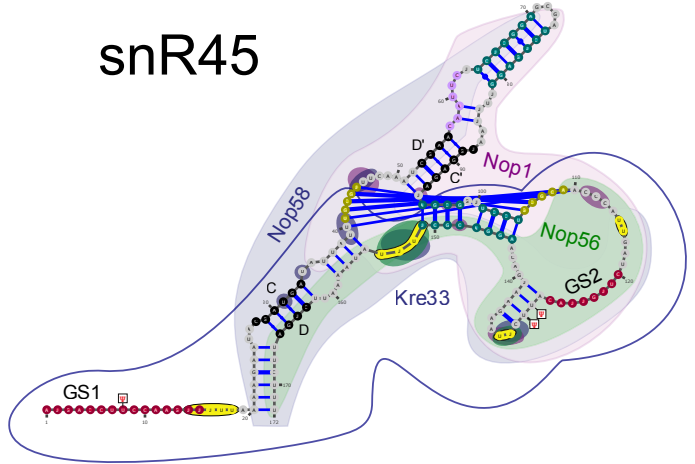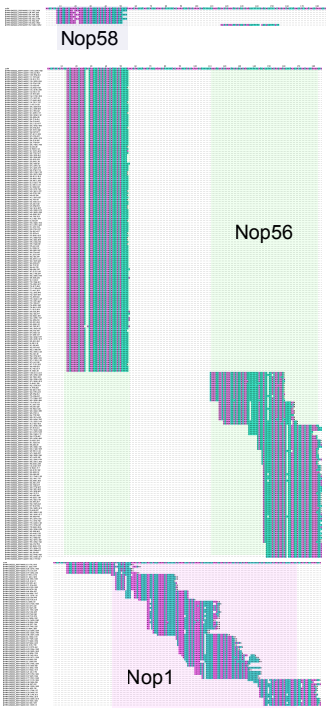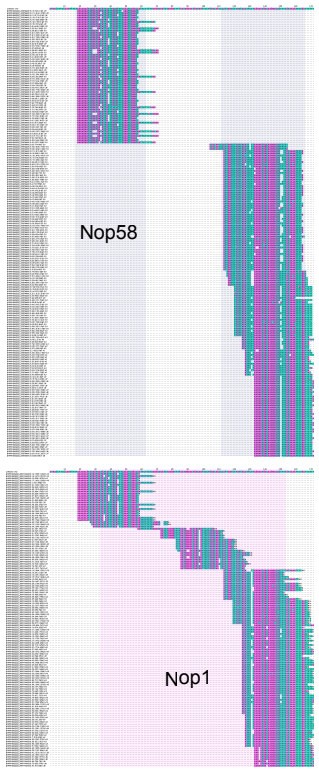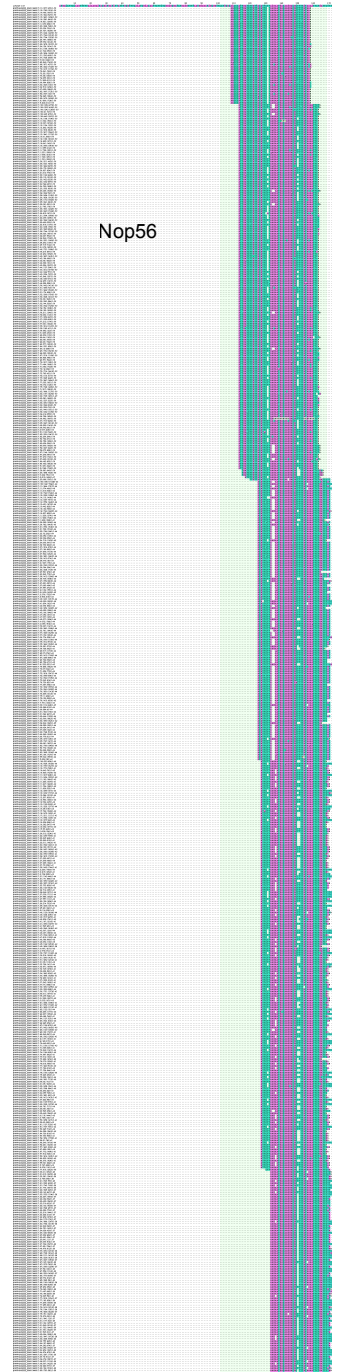

Supplement: pgen.1006804.s005.pdf [file pgen.1006804.s005.pdf]
