# Supplementary material for: Specialized box C/D snoRNPs act as antisense guides to target RNA base acetylation
Source: PubMed Central journal article supplement (PMC5464676; doi:10.1371/journal.pgen.1006804), 2017-05-24
Supplement: pgen.1006804.s008.pdf [file pgen.1006804.s008.pdf]

S1 Table. Hybrids containing snoRNA sequences

| Read No. ‡  | Sequence of hybrids between 18S rRNA and snoRNA                     | ΔG*   | 5' Source | from | to   | 3' Source (motif)        | from | to   |
|-------------|---------------------------------------------------------------------|-------|-----------|------|------|--------------------------|------|------|
| 130876-1_2  | TAGTGAAACTGCGAATGGCTCCACG <b>GTGATGA</b> AAGACTGGT                  | -3    | RDN37-1   | 80   | 99   | U14 / snR128 (C)         | 2    | 21   |
| -12350-2_5  | AGTGAAACTGCGAATGGCTCAA <b>CATTCGCAGTTTC</b> CACG <b>G</b>           | -20.6 | RDN37-2   | 80   | 100  | U14 / snR128             | 27   | 46   |
| 63756-1_6   | TTGGCCTTTT <b>TCACCACC</b> TTTAT <b>TTTTGTG</b> <b>GGTGGTGG</b> TGC | -14.5 | snR4      | 133  | 154  | RDN37-1                  | 1257 | 1274 |
| 97648-1_3   | TAAGGAAGGCAGCAGGCGCGCTACT <b>ATGATGA</b> ATGACATTA                  | -1.8  | RDN37-1   | 416  | 435  | snR52 (C)                | 1    | 20   |
| 99477-1_3   | TGGAGGGCAAGTCTGGTGCCAGCAAAAAGCTGT <b>GCACCAG</b> T                  | -18.1 | RDN37-1   | 547  | 570  | snR40                    | 14   | 31   |
| 133303-1_2  | <b>TGG</b> TGCATGGCCGTTCTTGTA <b>ATGACGA</b> GAAAAAAGCTG            | -7.4  | RDN37-1   | 1269 | 1289 | snR40 (C)                | 1    | 22   |
| 301878-1_1  | <b>TGGTGG</b> TGCATGGCCGTTCTTGTA <b>ATGACGA</b> GAAAAAAGC           | -3.2  | RDN37-1   | 1266 | 1286 | snR40                    | 1    | 20   |
| 77693-1_4   | CACAT <b>CATGCATCACCATCT</b> <b>TTTTGTG</b> <b>GGTGGTGG</b> TGCATG  | -21.2 | snR55     | 76   | 94   | RDN37-1                  | 1257 | 1277 |
| -18530-1_2  | GAT <b>CATGCATCACCATCTGA</b> TTAAGGATTGACAGATTGAG                   | -6.3  | snR55     | 78   | 98   | RDN37-2                  | 1225 | 1243 |
| 125983-1_2  | <b>GATTTTGTG</b> <b>GGTGGTGG</b> TGCATGATCCG <b>GCGA</b> TGATTCTT   | -6.8  | RDN37-1   | 1255 | 1277 | snR55 (D')               | 38   | 55   |
| 251846-1_1  | GG <b>ATTTGTG</b> <b>GGTGGTGG</b> TGCAAAT <b>CATGCATCACCATCTGA</b>  | -19.9 | RDN37-1   | 1258 | 1275 | snR55 (D)                | 78   | 96   |
| 62794-1_6   | <b>GTTTTGTG</b> <b>GGTGGTGG</b> TGCATAGCAT <b>CATGCATCACCATCT</b>   | -23.2 | RDN37-1   | 1257 | 1279 | snR55                    | 77   | 94   |
| 310610-1_1  | <b>TTTTGTG</b> <b>GGTGGTGG</b> TGCATTGGAAT <b>ATGTGCC</b> ATGGATT   | -10.3 | RDN37-1   | 1257 | 1276 | snR55 (C')               | 55   | 75   |
| 301495-1_1  | <b>TGGGTGGTGG</b> TGCATGGCCGTT <b>C</b> ATGGATTACAT <b>CATGCAT</b>  | -8.9  | RDN37-1   | 1262 | 1284 | snR55                    | 68   | 86   |
| 92915-1_3   | CCGCGTAATTCCAGCTCCAATAAAAACAAA <b>AGCTGGAATT</b>                    | -13   | RDN37-1   | 572  | 594  | snR77                    | 20   | 38   |
| 99442-1_3   | TGCGGTAATTCCAGCTCCAATAAAA <b>AGCTGGAATTACTG</b> <b>GCT</b>          | -20.6 | RDN37-1   | 574  | 594  | snR77                    | 26   | 45   |
| 183610-1_1  | CAGTAATTCCAGCTCCAATAAAA <b>AGCTGGAATTACTG</b> <b>GCTGA</b>          | -17.2 | RDN37-1   | 577  | 594  | snR77 (D')               | 26   | 47   |
| 32255-1_15  | CGGTAATTCCAGCTCCAATAAAA <b>AGCTGGAATTACTG</b> <b>GCTGA</b>          | -20.4 | RDN37-1   | 575  | 594  | snR77 (D')               | 26   | 47   |
| 202069-1_1  | CGGTAATTCCAGCTCCAATAAAA <b>AGCTGGAATTACTG</b> <b>GCTG</b>           | -20.4 | RDN37-1   | 575  | 594  | snR77                    | 26   | 46   |
| 202068-1_1  | CGGTAATTCCAGCTCCAATAAAA <b>AGCTGGAATTACTG</b> <b>GC</b>             | -20.4 | RDN37-1   | 575  | 594  | snR77                    | 26   | 44   |
| 125360-1_2  | GATGATCAGATACCGTCGTAGT <b>TTTA</b> <b>ATGATGA</b> TAGCATGA          | -7.1  | RDN37-1   | 994  | 1020 | snR79 (C)                | 1    | 18   |
|             |                                                                     |       |           |      |      |                          |      |      |
|             | <b>Sequence of hybrids between 25S rRNA and snoRNA</b>              |       |           |      |      |                          |      |      |
| -10468-1_11 | <b>CTA</b> TTACAGTCG <b>ATGAGGA</b> TGATCGTCGAATTTGGGTATA           | -9.8  | snR4      | 3    | 22   | RDN37-2<br>(snR40/snR60) | 3438 | 3457 |

|               |                                                                                            |       |                |      |      |            |     |     |
|---------------|--------------------------------------------------------------------------------------------|-------|----------------|------|------|------------|-----|-----|
| 226958-1_1    | GACGAATAAGGCGTCCTTG <b>TAC</b> ATTC <b>TTAAGAATGACAAG</b>                                  | -3.5  | <u>RDN37-1</u> | 5731 | 5749 | snR45      | 125 | 145 |
| 226959-1_1    | GACGAATAAGGCGTCCTTG <b>TAC</b> ATTC <b>TTAAGAATGACAAGG</b>                                 | -5.8  | <u>RDN37-1</u> | 5731 | 5749 | snR45      | 125 | 146 |
| 114554-1_2    | ACTGTTGGGACCCGAAAGATGATTTA <b>GTGATG</b> ATACTGCCG                                         | -2    | <u>RDN37-1</u> | 3344 | 3363 | snR39B (C) | 1   | 20  |
| 92889-1_3     | CCGAGCTTGACTCTAGTTT <b>ACTCAA</b> ATGATGA <b>AATAACAA</b>                                  | -5.6  | <u>RDN37-1</u> | 4963 | 4982 | snR66 (C)  | 2   | 20  |
| 285819-1_1    | TATAGGGGCGAAAGACTACTATCGAA <b>ATGAAGA</b> TAAAAATT                                         | -4    | <u>RDN37-1</u> | 3454 | 3471 | snR60 (C') | 46  | 70  |
| 117007-1_2    | CAAGTGGGAGCTTCGGCGCCACTATCGAA <b>ATGAAGA</b> TAAAA                                         | -5.7  | <u>RDN37-1</u> | 5012 | 5031 | snR60 (C') | 47  | 67  |
|               |                                                                                            |       |                |      |      |            |     |     |
|               | <b>Sequence of other hybrids with snoRNA</b>                                               |       |                |      |      |            |     |     |
| 97363-1_3     | TAAAGGGTTGCGCTTCTTTCTGCGCAACCCA <b>TTGATCTTG</b>                                           | -18.4 | <u>TEF1/2</u>  | 1286 | 1304 | snR45      | 100 | 123 |
|               |                                                                                            |       |                |      |      |            |     |     |
| <b>legend</b> | target <b>guide</b> <b>box C, D, C', or D'</b> Kre33- <i>Xlink</i> site <b>snR4-target</b> |       |                |      |      |            |     |     |

‡ Reads are from the main data set (data-set II) and from a library with ~5-fold less coverage (-*dataset I*)

\* predicted folding energy (kcal/mol) of the hybrid
