# Supplementary material for: Specialized box C/D snoRNPs act as antisense guides to target RNA base acetylation
Source: PubMed Central journal article supplement (PMC5464676; doi:10.1371/journal.pgen.1006804), 2017-05-24
Supplement: pgen.1006804.s009.pdf [file pgen.1006804.s009.pdf]

## S2 Table. Strains, plasmids and oligonucleotides

| Name          | Description                                                                                                                               | Source                |
|---------------|-------------------------------------------------------------------------------------------------------------------------------------------|-----------------------|
| CEN.PK1303-5A | MAT a, ura3-52;his3-Δ1; leu2-3,112; trp1-289; MAL2-8 <sup>c</sup> , SUC2, snr45(1,172)::loxP-kanMX4-loxP                                  | This study            |
| CEN.PK1351-5B | MAT a, ura3-52;his3-Δ1; leu2-3,112; trp1-289; MAL2-8 <sup>c</sup> , SUC2, snr4(-50,186)::loxP-kanMX4-loxP                                 | This study            |
| CEN.WA4-9C    | MAT α, ura3-52;his3-Δ1; leu2-3,112; trp1-289; MAL2-8 <sup>c</sup> , SUC2, snr4(-50,186)::loxP-kanMX4-loxP; snr45(1,172)::loxP-kanMX4-loxP | This study            |
| BY4741        | MATa; his3Δ1; leu2Δ0; met15Δ0; ura3Δ0                                                                                                     | Euroscarf             |
| SC1403        | MATa; ura3-52; leu2-3,112; KRE33::TAP-KIURA3                                                                                              | Euroscarf             |
| SC1541        | MATa; ura3-52; leu2-3,112; NOP58::TAP-KIURA3                                                                                              | Euroscarf             |
| SC1110        | MATa; ura3-52; leu2-3,112; GAR1::TAP-KIURA3                                                                                               | Euroscarf             |
| BY.WA5-2B     | MAT α, ura3Δ0; leu2Δ0; his3Δ1; KRE33::kanMX4 + pSH35                                                                                      | (Sharma et al., 2015) |
| BY.WA6-1B     | MAT α, ura3Δ0; leu2Δ0; his3Δ1; KRE33::kanMX4 + pSH35a                                                                                     | (Sharma et al., 2015) |
| BY.WA8-1B     | MAT α, ura3Δ0; leu2Δ0; his3Δ1; KRE33::kanMX4 + pSH35c                                                                                     | (Sharma et al., 2015) |
| BY.WA9-1C     | MAT A, ura3Δ0; leu2Δ0; his3Δ1; KRE33::kanMX4 + pSH35d                                                                                     | (Sharma et al., 2015) |
| pJN23         | A derivative pRS426 plasmid carrying <i>SNR4</i>                                                                                          | This study            |
| pJN23a        | A derivative pRS426 plasmid carrying snr4(1,8)::TTGATTAT                                                                                  | This study            |
| pJN23b        | A derivative pRS426 plasmid carrying snr4(142,150)::GGTGGTGGG                                                                             | This study            |
| pJN23c        | A derivative pRS426 plasmid carrying snr4(93,102)::GGTTGATTCT                                                                             | This study            |
| pJN23d        | A derivative pRS426 plasmid carrying snr4(56,66)::TTAATGAGGT                                                                              | This study            |
| pJN23e        | A derivative pRS426 plasmid carrying snr4(136,142)::AAGGGGG                                                                               | This study            |
| pJN23f        | A derivative pRS426 plasmid carrying snr4(130,150)::ATCTTGTTAC                                                                            | This study            |
| pJN23g        | A derivative pRS426 plasmid carrying snr4(93,102)::AGGTTT; (130,150)::ATCTTGTTAC                                                          | This study            |
| pJN23h        | A derivative pRS426 plasmid carrying snr4(56,66)::TCTTCTCG; (93,102)::AGGTTT; (130-150)::ATCTTGTTAC                                       | This study            |
| pJN28         | A derivative pRS426 plasmid carrying <i>SNR45</i>                                                                                         | This study            |
| pJN28a        | A derivative pRS426 plasmid carrying snr45(3,10)::GACCTTCC                                                                                | This study            |
| pJN28b        | A derivative pRS426 plasmid carrying snr45(77,84)::GTAACCAG                                                                               | This study            |
| pJN28c        | A derivative pRS426 plasmid carrying snr45(61,68)::AGGACGGC                                                                               | This study            |
| pJN28d        | A derivative pRS426 plasmid carrying snr45(117,127)::TTGGAACAATG                                                                          | This study            |
| pJN28e        | A derivative pRS426 plasmid carrying snr45(144,150)::Δ                                                                                    | This study            |
| pJN28f        | A derivative pRS426 plasmid carrying snr45(110,118)::Δ                                                                                    | This study            |
| pJN28g        | A derivative pRS426 plasmid carrying snr45(79,84)::TTGTGTAAGA; (118,127)::CCGTGGCCTTTTTCACCACCT                                           | This study            |
| pJN28h        | A derivative pRS426 plasmid carrying snr45(61,68)::AAATAACTCTA; (79,84)::TTGTGTAAGA; (118,127)::CCGTGGCCTTTTTCACCACCT                     | This study            |
| pSH35         | A derivative pPK468 plasmid carrying Kre33-7xHis                                                                                          | (Sharma et al., 2015) |
| pSH35a        | A derivative pPK468 plasmid carrying kre33-K289A                                                                                          | (Sharma et al., 2015) |
| pSH35c        | A derivative pPK468 plasmid carrying kre33-H545A                                                                                          | (Sharma et al., 2015) |
| pSH35d        | A derivative pPK468 plasmid carrying kre33-R637A                                                                                          | (Sharma et al., 2015) |
| <b>Name</b>   | <b>Sequence 5' → 3'</b>                                                                                                                   |                       |
| pJN23-A1      | GAATTGGGTACCGGGCCCCCCTCGAGGTCGACGGTATCGATAAGAAAGCTTTGTAATATG                                                                              |                       |
| pJN23-A2      | GAGCTCCACCGCGGTGGCGGCCGCTCTAGAACTAGTGGATCGGTATAATAGAAGAATTTAG                                                                             |                       |

|                     |                                                                                                                  |  |
|---------------------|------------------------------------------------------------------------------------------------------------------|--|
| pJN28-A1            | GAATTGGGTACCGGGCCCCCCTCGAGGTGACGGTATCGATAGATTAA<br>CTTGATAATGGAGTTG                                              |  |
| pJN28-A2            | GAGCTCCACCGCGGTGGCGGCCGCTCTAGAAGTGTGGATCGAGACCAA<br>TCGACAGTCTTC                                                 |  |
| snR4-nb             | CTAGAGTTATTTTAAAACAC                                                                                             |  |
| snR45-nb            | GCGCAGGAACCGCTATCTCC                                                                                             |  |
| snR4-Mod-<br>probe  | TATTAATAGTTAAAGCACCG                                                                                             |  |
| snR45-Mod-<br>probe | ATTTTATAAAAAGCGTCCTTG                                                                                            |  |
| pJN23a-sp-FP        | CATTTTTTTATTTCAAATCCCCATCTTGATAATCAGTCGATGAGGATAGGT<br>TATAG                                                     |  |
| pJN23a-sp-RP        | CTATAACCTATCCTCATCGACTGATTATCAAGATGGGGATTTTGAATAAA<br>AAAATG                                                     |  |
| pJN23b-sp-F2        | GATTGTGCCGTGGCCTTTTGGTGGTGGTTATAGCGGTGCTTTAACTATT<br>AATAACTG                                                    |  |
| pJN23b-sp-R2        | ATTAATAGTTAAAGCACCGCTATAACCCACCACCAAAGGCCACGGCACA<br>ATCCACATC                                                   |  |
| snR4-cF             | GGCGTTTTTCACAAAGTGTTGATTCTTGCTTTCTGGGTGCGATGTGG                                                                  |  |
| snR4-cR             | CGACCCAGGAAAGCAAGAATCAACCACTTTGTGAAAAACGCCCC                                                                     |  |
| pJN23d-sp-F2        | GTGTAACATCTGTGTTTTATTTAATGAGGTGTTATCCGGGGCGTTTTTCAC<br>AAAG                                                      |  |
| pJN23d-sp-R2        | GTGAAAAACGCCCGGATAACACCTCATTAATAAAACACAGATGTTACAC<br>ATG                                                         |  |
| snR4-eF             | GGGTGCGATGTGGATTGTGCCGTGGAAGGGGGCACCCACCTTTATAGCGGT<br>GCTTTAAC                                                  |  |
| snR4-eR             | GCACCGCTATAAAGGTGGTGCCCCCTTCCACGGCACAATCCACATCGAC<br>CCAGGAAAGC                                                  |  |
| snR4-fF             | GGATTGTGATCTTGTTACTTATAGCGGTGCTTTAACTATTAATAAC                                                                   |  |
| snR4-fR             | CGCTATAAGTAACAAGATCACAATCCACATCGACCCAGG                                                                          |  |
| snR4-gF2            | CACAAAGTAGTTTTGCTTTCTGGGTGCGATGTG                                                                                |  |
| snR4-gR2            | GCAAAACCTACTTTGTGAAAAACGCCCG                                                                                     |  |
| pJN23h-sp-F3        | CATCTGTGTTTTATCTTCTCGTTATCCGGGGCGTTTTTCACAAAGTAGGT<br>TTTGC                                                      |  |
| pJN23h-sp-R3        | CCCGGATAACCGAGAAGATAAAACACAGATGTTACACATGAACTATAACC                                                               |  |
| pJN28a-sp-FP        | GGTTTCATTTAAAGAAACCAATCTGGAAGGAAGTTTTTAAAAGAATACGAT<br>G                                                         |  |
| pJN28a-sp-RP        | CGTATTCTTTTAAAACCTCCTTCCAGATTGGTTTCTTTAAATGAAACCTCC                                                              |  |
| pJN28c-sp-F2        | GCGTTTCAAATCGAACAATAGGACGGCGAGCGATCTGAGGTTTTAATGGA<br>G                                                          |  |
| pJN28c-sp-R2        | CATTA AACCTCAGATCGCTCGCCGTCCTATTGTTGATTTGAAACGCAAA<br>TAATATC                                                    |  |
| pJN28e-sp-F2        | CTTGTTACATTCTTAAGAATGACATTTTATAAAATTCTGATTCTTTTTCTTT<br>C                                                        |  |
| pJN28e-sp-R2        | GAAAGAAAAAGAATCAGAATTTTATAAAATGTCATTCTTAAGAATGTAACA<br>AGATC                                                     |  |
| snR45-1             | CTTGGAAGGTCATTGGTTTCTTTAAATGAAACCTCCAAAGAAAATCTAACG<br>CGTCTTGGTAAAATATATGTACCGAGTGTTCGCTTTTTATACC               |  |
| snR45-2             | GGAGGTTTCATTTAAAGAAACCAATGACCTTCCAAGTTTTTAAAAGAATAC<br>GATGATATTATTTGCGTTTCAAATCGAACAATTCTTCTCGGAGCGATCTGA<br>GG |  |
| snR45-2b            | GGAGGTTTCATTTAAAGAAACCAATGACCTTCCAAGTTTTTAAAAGAATAC<br>GATGATATTATTTGCGTTTCAAATCGAACAATTCTTCTCGGAGCGATC          |  |

|           |                                                                                                                       |  |
|-----------|-----------------------------------------------------------------------------------------------------------------------|--|
| snR45-3b  | GTCCTTGTCACTTCTTAAGAATGTAACAAGATCAATGGGTTGCGCAGGAAC<br>CGCTATCTCCACTTACTGTTACGATCGCTCCGAGAAGAATTGTTTCGATTTG<br>AAACGC |  |
| snR45-4b  | CCCATTGATCTTGTACATTCTTAAGAATGACAAGGACGCTTTTATAAAATT<br>CTGATTCTTTTTCTTTTCATTCTTTTGTGTTTTGACTTGGGAG                    |  |
| snR45-3d  | CCTTGTCACTTCTTAAGAATCATTGTTCCAAAATGGGTTGCGCAGGAACCG<br>CTATCTCCATTAACCTCAGATCGCTCCGAGAAGAATTGTTTCGATTTG               |  |
| snR45-4d  | GCAACCCATTTTGGAAACAATGATTCTTAAGAATGACAAGGACGCTTTTATA<br>AAATTCTGATTCTTTTTCTTTTCATTCTTTTGTGTTTTGACTTGGG                |  |
| snR45-3f  | GCGTCCTTGTCACTTCTTAAGAATGTAACAAGATGCGCAGGAACCGCTATC<br>TCCATTAACCTCAGATCGCTCCGAGAAGAATTGTTTCGATTTG                    |  |
| snR45-4f  | GGTTCTGCGCATCTTGTACATTCTTAAGAATGACAAGGACGCTTTTATA<br>AAATTCTGATTCTTTTTCTTTTCATTCTTTTGTGTTTTGACTTGGG                   |  |
| snR45-3g  | GAATAGGTGGTGAAAAAGGCCACGGCAATGGGTTGCGCAGGAACCGCTA<br>TCTCCATTATCTTACACAACAGATCGCTCCGAGAAGAATTGTTTCGATTTG              |  |
| snR45-2h  | CATTAAAGAAACCAATGACCTTCCAAGTTTTTAAAGAATACGATGATATT<br>ATTTGCGTTTTCAAATCGAACAATAAATAACTCTAGAGCGATCTGTTG                |  |
| snR45-3h  | GAATAGGTGGTGAAAAAGGCCACGGCAATGGGTTGCGCAGGAACCGCTA<br>TCTCCATTATCTTACACAACAGATCGCTCTAGAGTTATTTATTGTTTCG                |  |
| snR45-4h  | CCCATTGCCGTGGCCTTTTTCCACCACCTATTCTTAAGAATGACAAGGACG<br>CTTTTATAAAATTCTGATTCTTTTTCTTTTCATTCTTTTGTGTTTTGAC              |  |
| snR45-5   | CTAGTCTACAATTTAAGAACATATAAAAAGCTACTTGTGTACAGATGAGAT<br>GACTACTCCAAGTCAAAAACAACAAAAGAATGAAAGAAAAAAG                    |  |
| probe 33  | CGCTGCTCACCAATGG                                                                                                      |  |
| probe 20  | TGAGAAGGAAATGACGCT                                                                                                    |  |
| probe 9   | CCCACCTATTCCTCTTGC                                                                                                    |  |
| probe 5   | GATTGCTCGAATGCCCAAAG                                                                                                  |  |
| probe 4   | CGGTTTTAATTGCCTA                                                                                                      |  |
| PE_40_25S | TATCCTGAGGGAAACTTCGG                                                                                                  |  |
| PE_34_18S | TAAGGTCTCGTTCGTTATCGC                                                                                                 |  |
