# Supplementary material for: Specialized box C/D snoRNPs act as antisense guides to target RNA base acetylation
Source: PLOS journal article supplement (doi:10.1371/journal.pgen.1006804), 2017-05-24

**A**

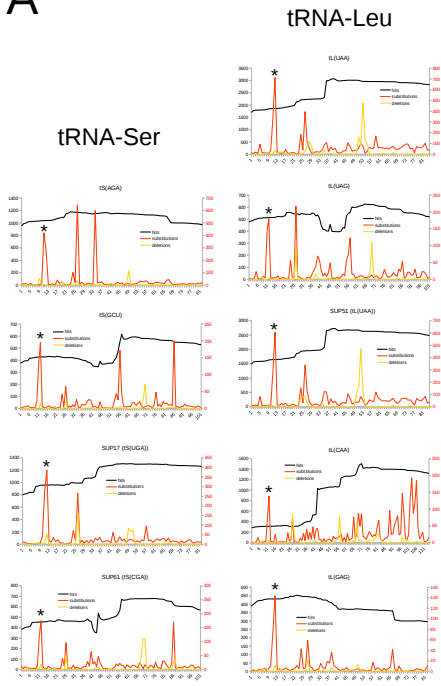

**C**

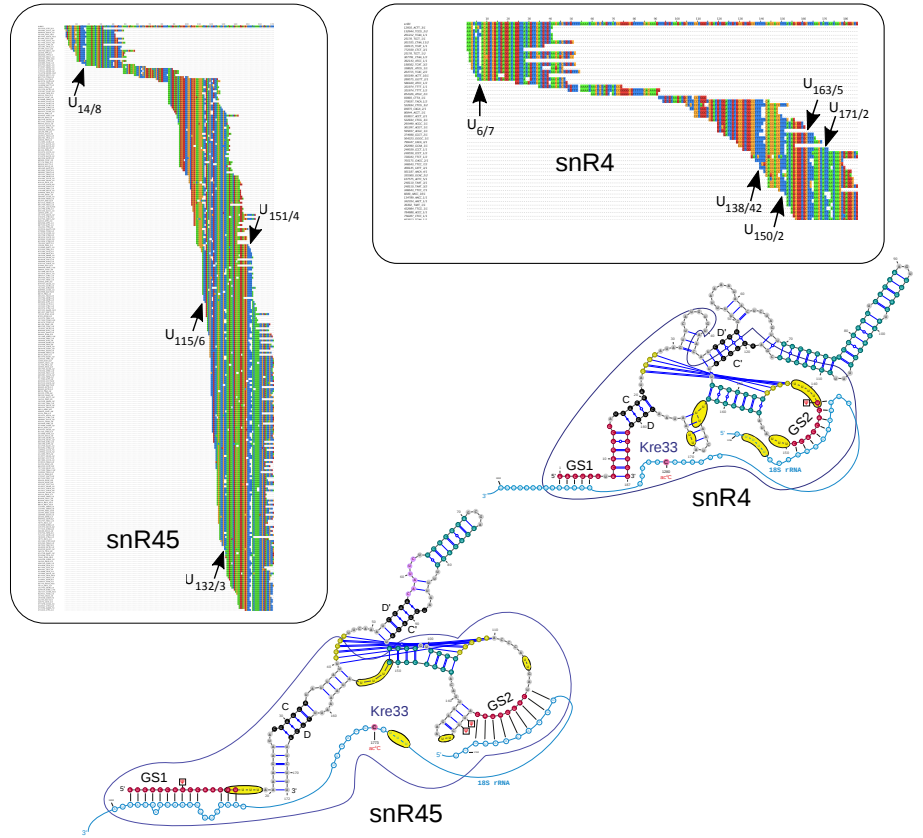

**B**

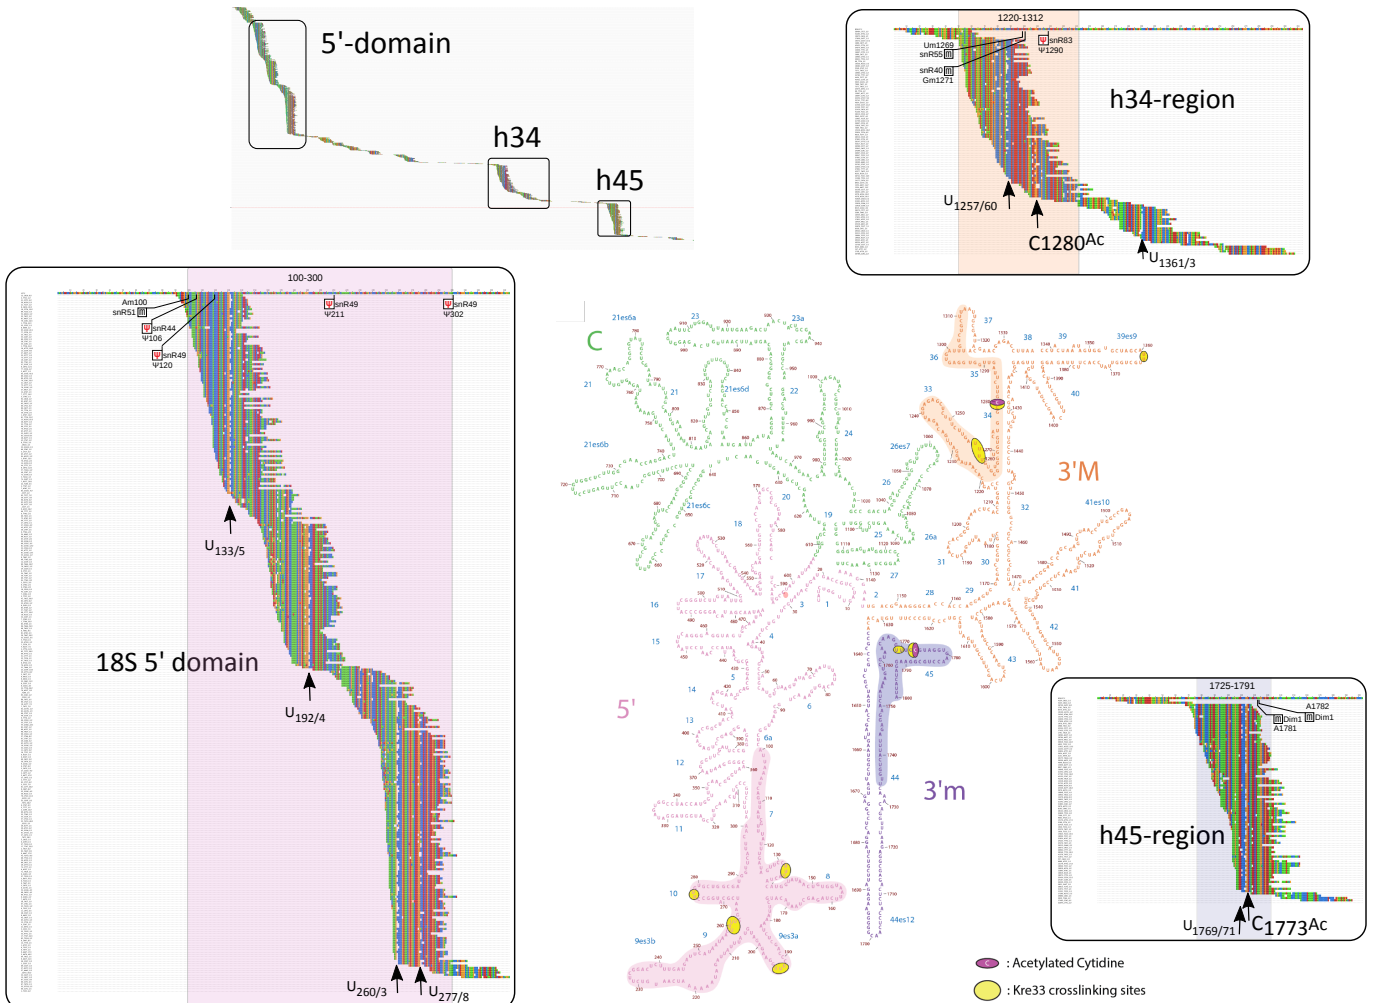

Supplement: S1 (10.1371/journal.pgen.1006804.s001) [file journal.pgen.1006804.s001.pdf]
