# Supplementary material for: Specialized box C/D snoRNPs act as antisense guides to target RNA base acetylation
Source: PLOS journal article supplement (doi:10.1371/journal.pgen.1006804), 2017-05-24

**A****snR45**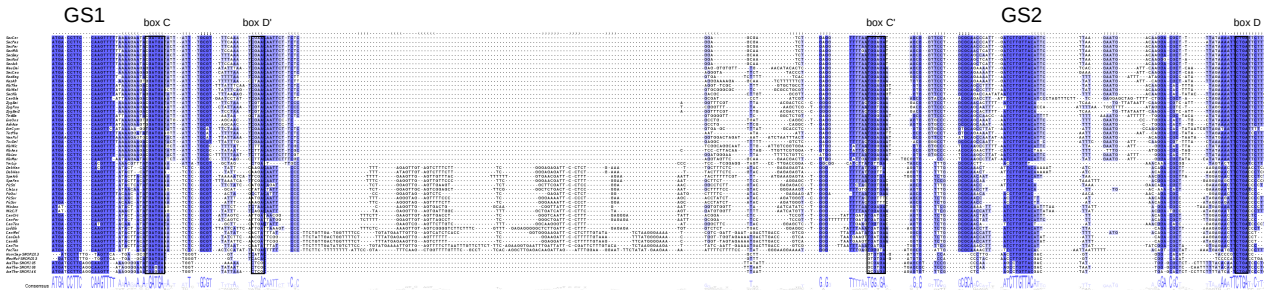**B**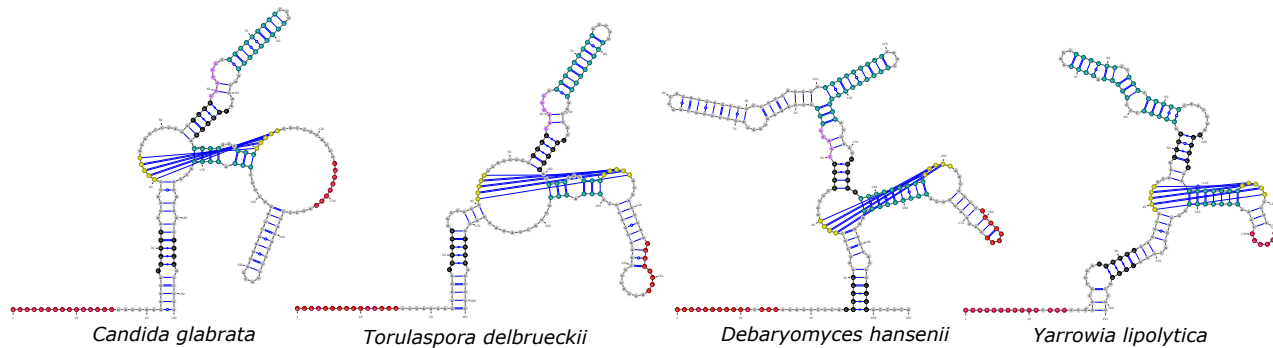

Supplement: S2 (10.1371/journal.pgen.1006804.s002) [file journal.pgen.1006804.s002.pdf]
